# Supplementary material
Source: Research Square preprint supplement (doi:10.21203/rs.3.rs-9942109/v1)
Supplement: Supplementary file 1 [file a268c15d3a9a13dc4c39f050.docx]

**Table 1 Evaluation results of the practical applicability of this strategy**

| **Category** | **Microbial Type** | **SERS-Based Method （CFU/mL）** | **Plate Counting Method （CFU/mL）** | **Accuracy(%)** | **RSD(%)** |
| --- | --- | --- | --- | --- | --- |
| Liquid medium | *L. sakei* | (2.44±0.04)×106 | (2.48±0.06)×106 | 98.39 | 3.72 |
| *P. pentosaceus* | (3.62±0.03)×106 | (3.69±0.05)×106 | 98.10 | 3.04 |
| *S. xylosus* | (3.08±0.03)×106 | (3.12±0.04)×106 | 98.72 | 2.44 |
| *S. cerevisiae* | (3.61±0.06)×106 | (3.67±0.06)×106 | 98.37 | 3.35 |
| Milk | *L. plantarum* | (3.55±0.04)×105 | (3.62±0.06)×105 | 98.07 | 3.39 |
| *L. sakei* | (3.20±0.03)×105 | (3.25±0.04)×105 | 98.46 | 2.66 |
| *P. pentosaceus* | (3.34±0.02)×105 | (3.42±0.05)×105 | 97.66 | 3.43 |
| *P. acidilactici* | (3.43±0.04)×105 | (3.48±0.03)×105 | 98.56 | 2.49 |
| Beef | *S. vitulinus* | (3.29±0.05)×105 | (3.36±0.05)×105 | 97.92 | 3.67 |
| *S. xylosus* | (3.01±0.06)×105 | (3.08±0.03)×105 | 97.73 | 3.85 |
| *S. carnosus* | (3.15±0.03)×105 | (3.24±0.04)×105 | 97.22 | 3.95 |
| Bread | *W. anomalus* | (3.09±0.05)×105 | (3.14±0.06)×105 | 98.41 | 3.43 |
| *S. cerevisiae* | (3.44±0.03)×105 | (3.51±0.03)×105 | 98.01 | 2.90 |
| *P. kudriavzevii* | (2.91±0.02)×105 | (2.98±0.04)×105 | 97.65 | 3.42 |
